# Supplementary material for: Assessment of airborne particles and bioaerosols concentrations in a waste recycling environment in Brazil
Source: PubMed Central journal article supplement (PMC7481203; doi:10.1038/s41598-020-71787-0), 2020-09-09
Supplement: 41598_2020_71787_MOESM1_ESM.pdf [file 41598_2020_71787_MOESM1_ESM.pdf]

## Supplementary Material

### Assessment of airborne particles and bioaerosols concentrations in a waste recycling environment in Brazil

Caroline Fernanda Hei Wikuats<sup>1,\*</sup>, Eduardo Henrique Duarte<sup>1</sup>, Kátia Valéria Marques Cardoso Prates<sup>1</sup>,  
Laura Lahr Lourenço Janiaski<sup>1,2</sup>, Bárbara de Oliveira Gabriel<sup>1</sup>, Alex da Cunha Molina<sup>1</sup>, Leila  
Droprinchinski Martins<sup>1</sup>

<sup>1</sup> Federal University of Technology – Parana, 3131 Pioneiros Avenue, Londrina, PR, 86036-370, Brazil

<sup>2</sup> Present Address: Brandon University, 270 18<sup>th</sup> Street, Brandon, MB, R7A 6A9, Canada

\* **Corresponding Author:** Federal University of Technology – Parana, 3131 Pioneiros Avenue,  
Londrina, PR, 86036-370, Brazil. Phone number: +55 (43) 3323-1133, e-mail address:  
[carolinewikuats@alunos.utfpr.edu.br](mailto:carolinewikuats@alunos.utfpr.edu.br)

**Supplementary Figure S1** Waste processing shed of the MRF.

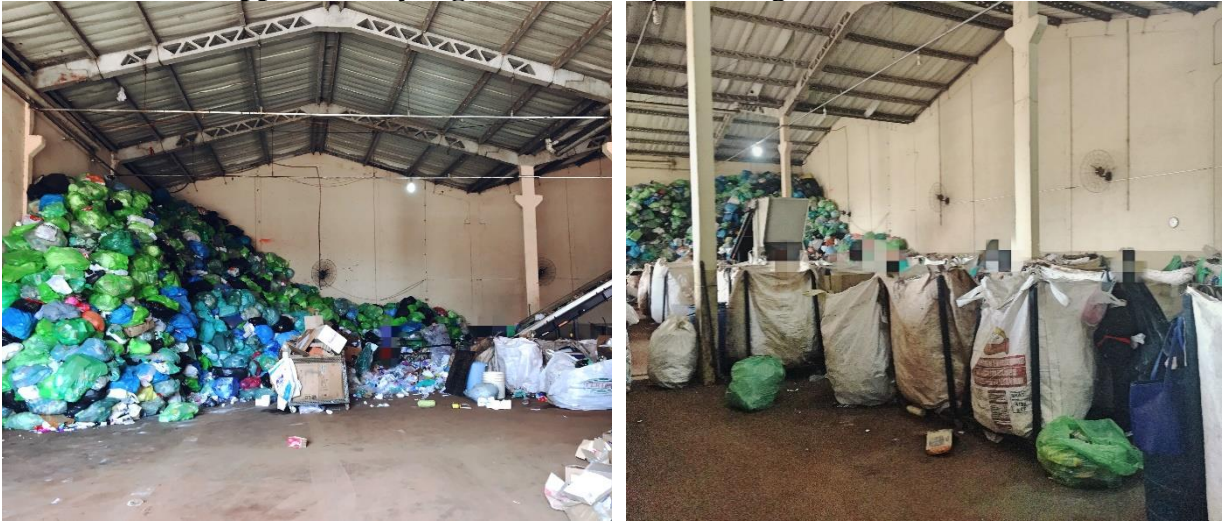

**Supplementary Figure S2** Outdoor environment of the MRF.

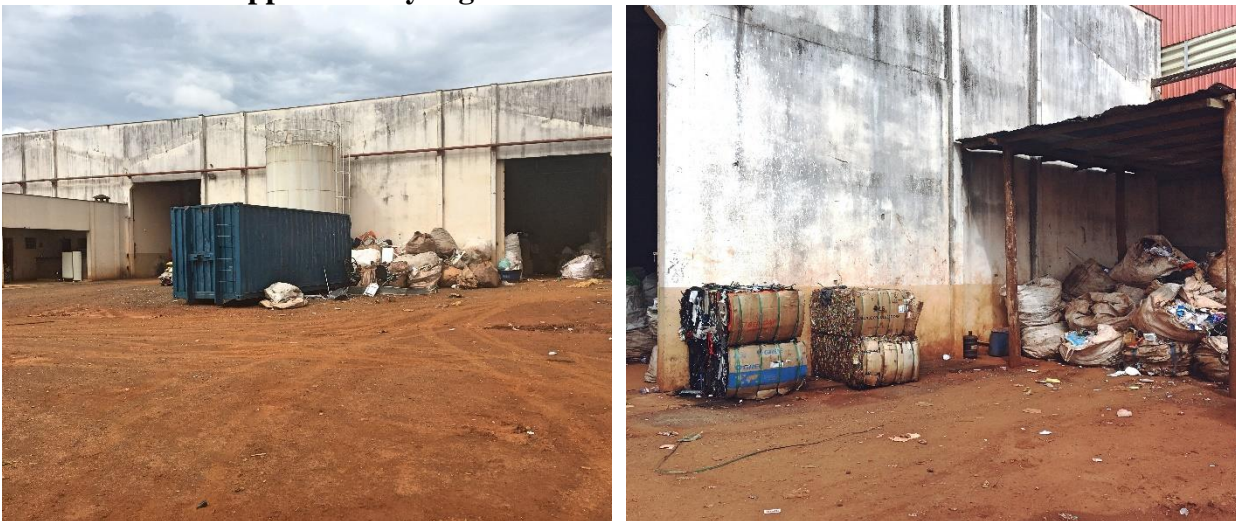

**Supplementary Table S1** Information on the activities observed during the sampling periods at the MRF.

| <b>Activities</b>                                                          | <b>Winter</b> | <b>Spring</b> | <b>Summer</b> |
|----------------------------------------------------------------------------|---------------|---------------|---------------|
| Unloading of the recyclable waste with trucks inside the WPS <sup>a</sup>  | X             | X             | XX            |
| Storage of the materials inside the WPS until sorting                      | XX            | X             | XX            |
| Manual sorting of the recyclable waste placed on screening tables/conveyor | XX            | XX            | XX            |
| Separation of the waste into big bags                                      | XX            | XX            | XX            |
| Movement of some big bags through the floor to the processing area         | XX            | XX            | XX            |
| Transfer of some big bags to the outside with a forklift                   | XX            | XX            |               |
| Storage of some big bags outdoors until processing                         | XX            | XX            |               |
| Waste processing via baling                                                | XX            | XX            | XX            |
| Transfer of the baled waste to the outdoor environment with a forklift     | XX            | XX            | XX            |
| Storage of the baled waste outdoors until commercialization                | XX            | XX            | X             |
| Sweeping the floor inside the WPS                                          | X             |               | XX            |
| Trucks manoeuvring in the exterior site                                    | X             | X             | X             |
| Shattering glass outside the WPS                                           |               |               | X             |

<sup>a</sup> WPS: waste processing shed; X: less frequently; XX: more frequently.

**Supplementary Table S2** Descriptive statistics for the meteorological variables in winter, spring, and summer measured outdoors\*.

| <b>Meteorological Variables</b> |                        | <b>Winter</b> |      | <b>Spring</b> |      | <b>Summer</b> |      |
|---------------------------------|------------------------|---------------|------|---------------|------|---------------|------|
|                                 |                        | a.m.          | p.m. | a.m.          | p.m. | a.m.          | p.m. |
| <b>Temperature (°C)</b>         | Mean                   | 16.2          | 20.3 | 20.3          | 26.8 | 25.0          | 27.2 |
|                                 | Median                 | 16.0          | 19.5 | 20.1          | 26.1 | 25.5          | 28.0 |
|                                 | Std. Dev. <sup>a</sup> | 2.4           | 4.4  | 4.5           | 4.8  | 2.3           | 2.6  |
| <b>Relative Humidity (%)</b>    | Mean                   | 83.4          | 63.4 | 58.8          | 35.8 | 81.3          | 69.1 |
|                                 | Median                 | 92.2          | 65.3 | 57.0          | 34.7 | 80.6          | 66.0 |
|                                 | Std. Dev.              | 18.2          | 36.8 | 17.6          | 6.3  | 9.8           | 13.0 |
| <b>Wind speed (m/s)</b>         | Mean                   | 2.2           | 2.2  | 3.0           | 3.3  | 1.7           | 2.9  |
|                                 | Median                 | 2.2           | 2.3  | 2.7           | 3.5  | 1.5           | 2.9  |
|                                 | Std. Dev.              | 0.6           | 0.6  | 1.0           | 0.7  | 0.7           | 1.0  |
| <b>Cumulative Rainfall (mm)</b> |                        | 58.4          |      | 39.2          |      | 68.2          |      |

\* Data from the Agronomic Institute of Parana for the Londrina weather station; <sup>a</sup> Std. Dev.: standard deviation.

**Supplementary Table S3** Descriptive statistics for the meteorological variables in winter, spring, and summer measured in the waste processing shed (P1).

| Meteorological Variables     |                        | Winter |      | Spring |      | Summer |      |
|------------------------------|------------------------|--------|------|--------|------|--------|------|
|                              |                        | a.m.   | p.m. | a.m.   | p.m. | a.m.   | p.m. |
| <b>Temperature</b><br>(°C)   | Mean                   | 20.7   | 23.1 | 23.7   | 27.1 | 29.0   | 30.9 |
|                              | Median                 | 20.3   | 23.5 | 23.4   | 27.1 | 29.0   | 29.8 |
|                              | Std. Dev. <sup>a</sup> | 0.9    | 1.1  | 1.5    | 1.0  | 1.2    | 2.7  |
| <b>Relative Humidity (%)</b> | Mean                   | 68.5   | 57.2 | 57.9   | 44.7 | 61.0   | 53.8 |
|                              | Median                 | 69.6   | 57.9 | 58.5   | 44.6 | 62.0   | 55.0 |
|                              | Std. Dev.              | 2.7    | 2.9  | 4.9    | 1.6  | 5.4    | 7.2  |

<sup>a</sup> Std. Dev.: standard deviation.
